# Supplementary material for: Mining the Genome of Bacillus velezensis VB7 (CP047587) for MAMP Genes and Non-Ribosomal Peptide Synthetase Gene Clusters Conferring Antiviral and Antifungal Activity
Source: MDPI journal article supplement (doi:10.3390/microorganisms9122511), 2021-12-03
Supplement: s1 [file s1]

**Figure S1** Phylogenetic tree representing the evolutionary relationships among the strains of *Bacillus velezensis* in comparison with test isolate VB7.

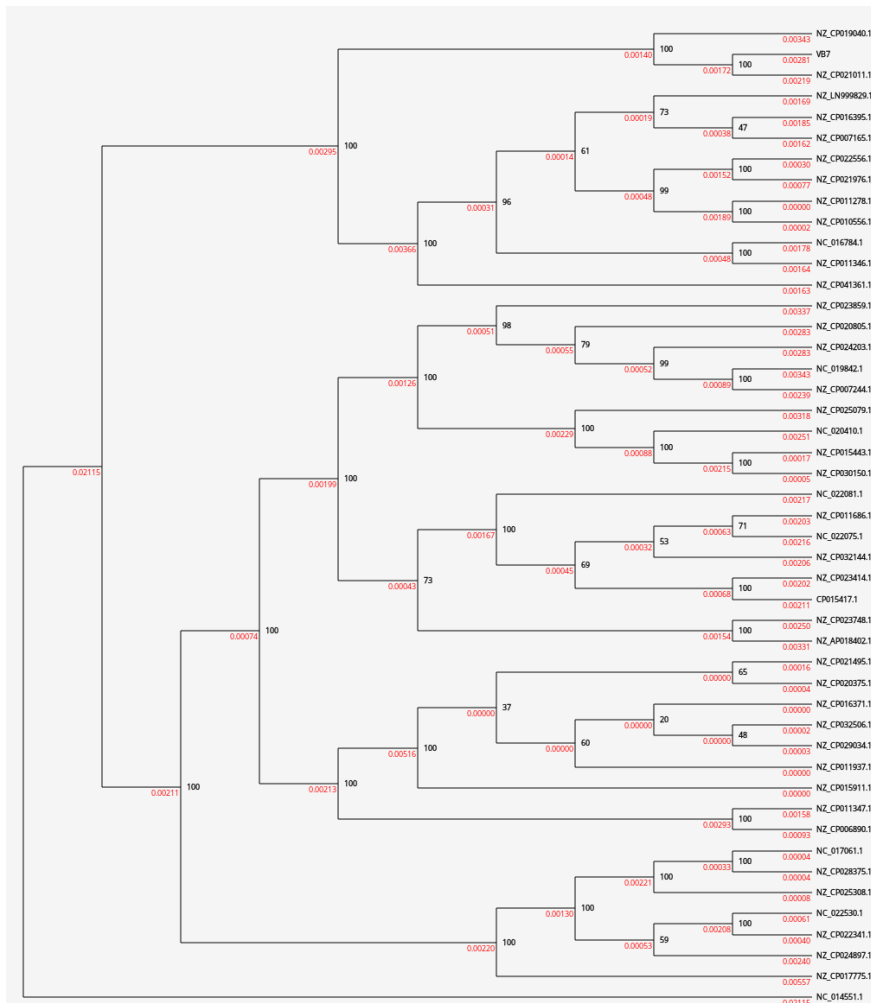

**Figure S2** Violin plot representing the dispersion of the identified ORFs count per genome.

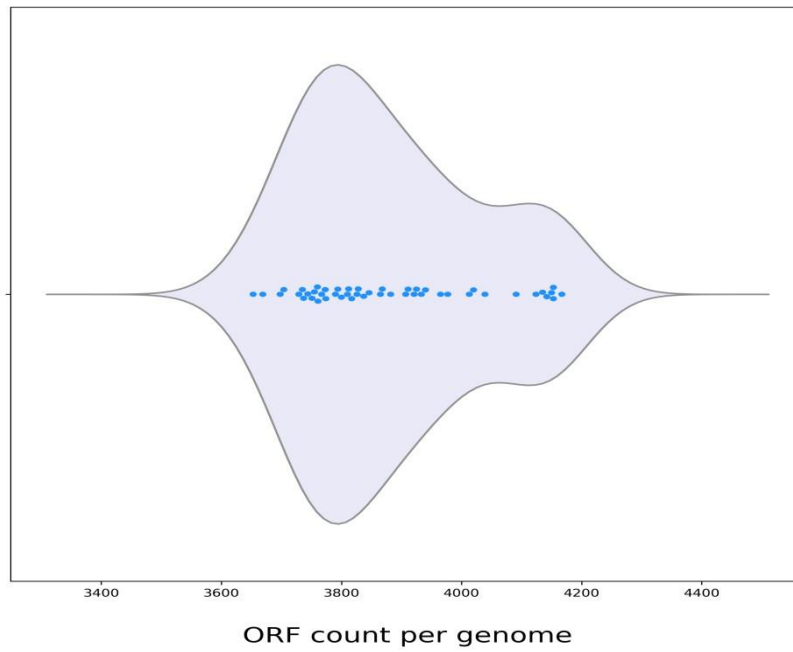

Fig S3. Region-1 coding for secondary metabolite, NRPS in genome of *B. velezensis*

VB7

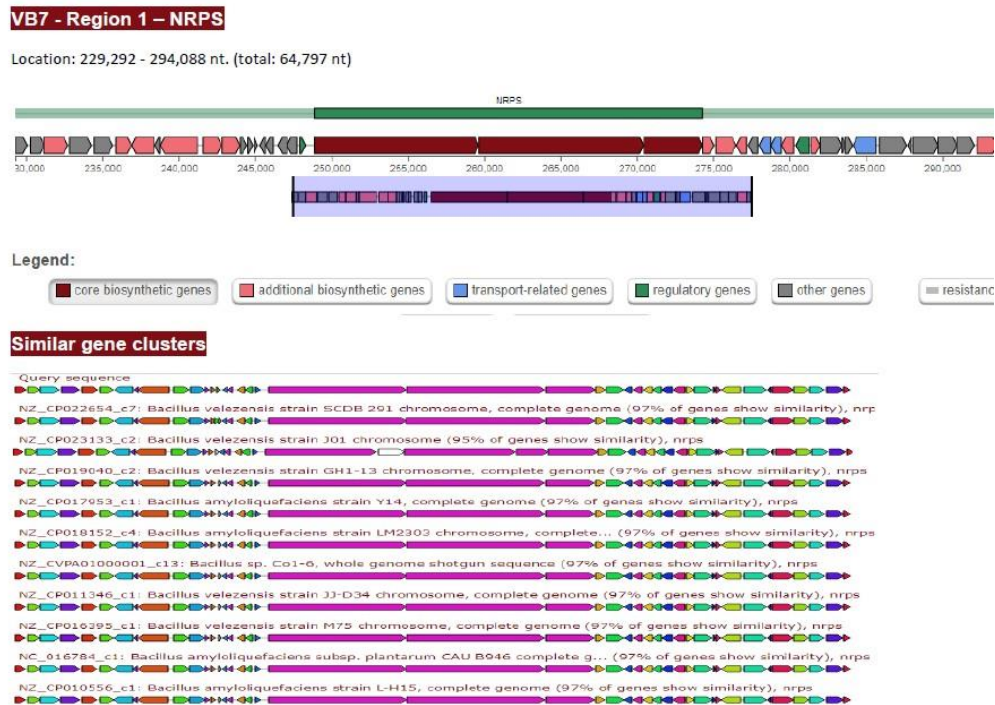

**Figure S4.** Region-2 coding for secondary metabolite, PKS like in genome of *Bacillus velezensis* – VB7

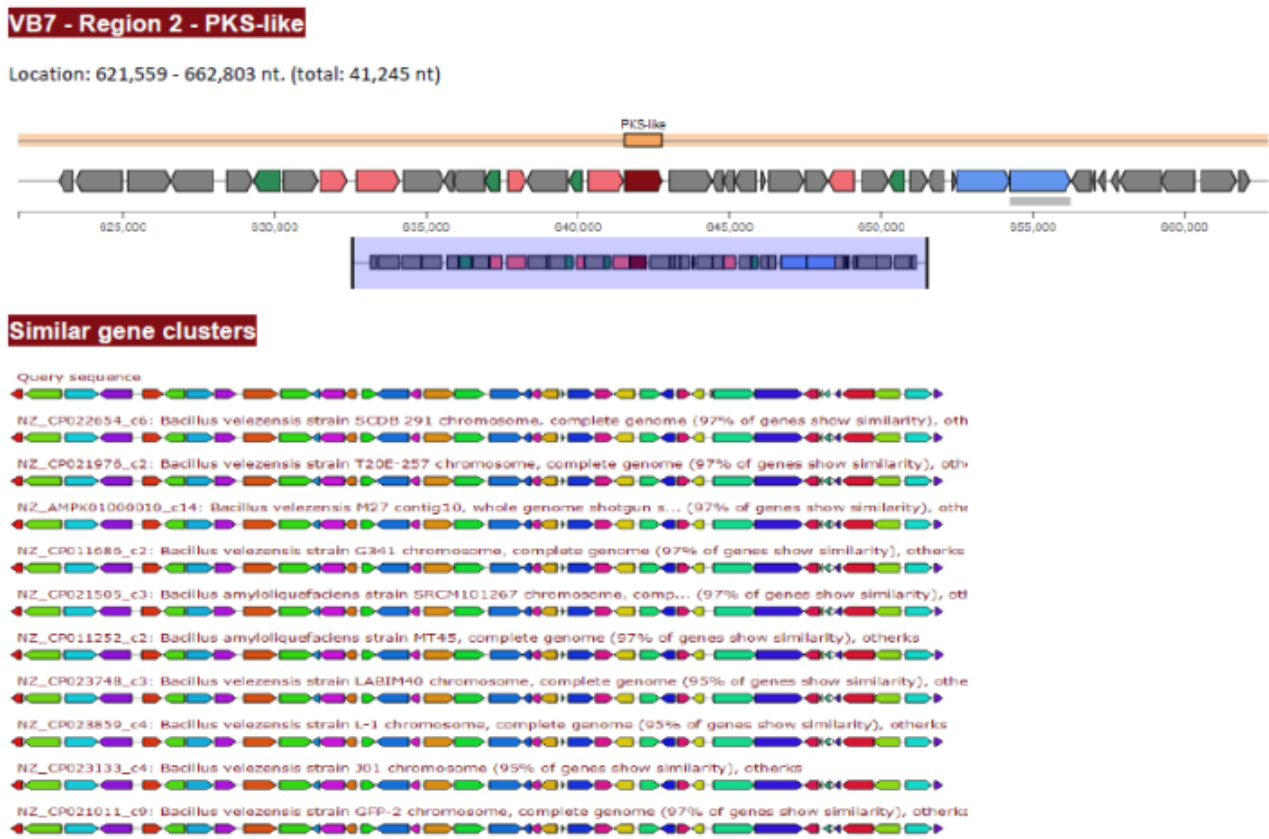

**Figure S5** Region-3 coding for secondary metabolite, terpene in genome of *Bacillus velezensis* – VB7

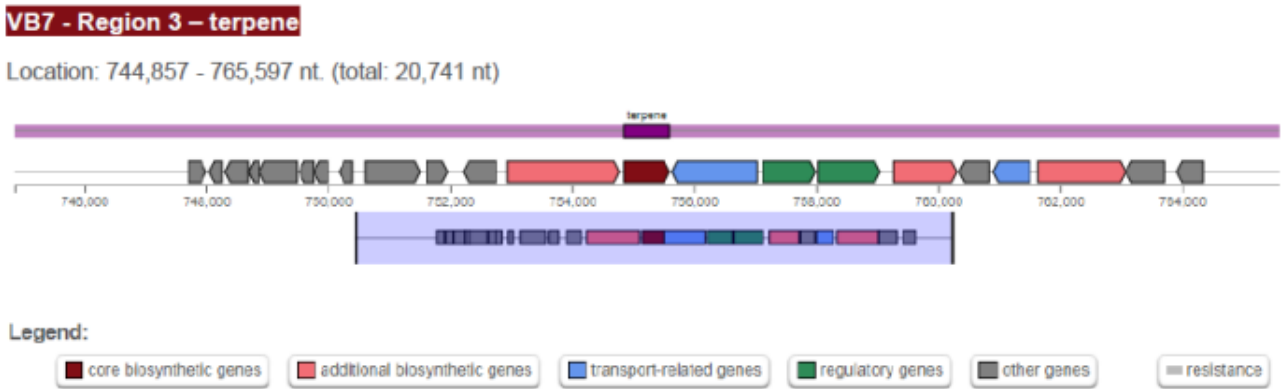

**Figure S6** mRegion-4 coding for secondary metabolite, NRPS, betalactone, transAT-  
PKS in genome of *Bacillus velezensis* – VB7

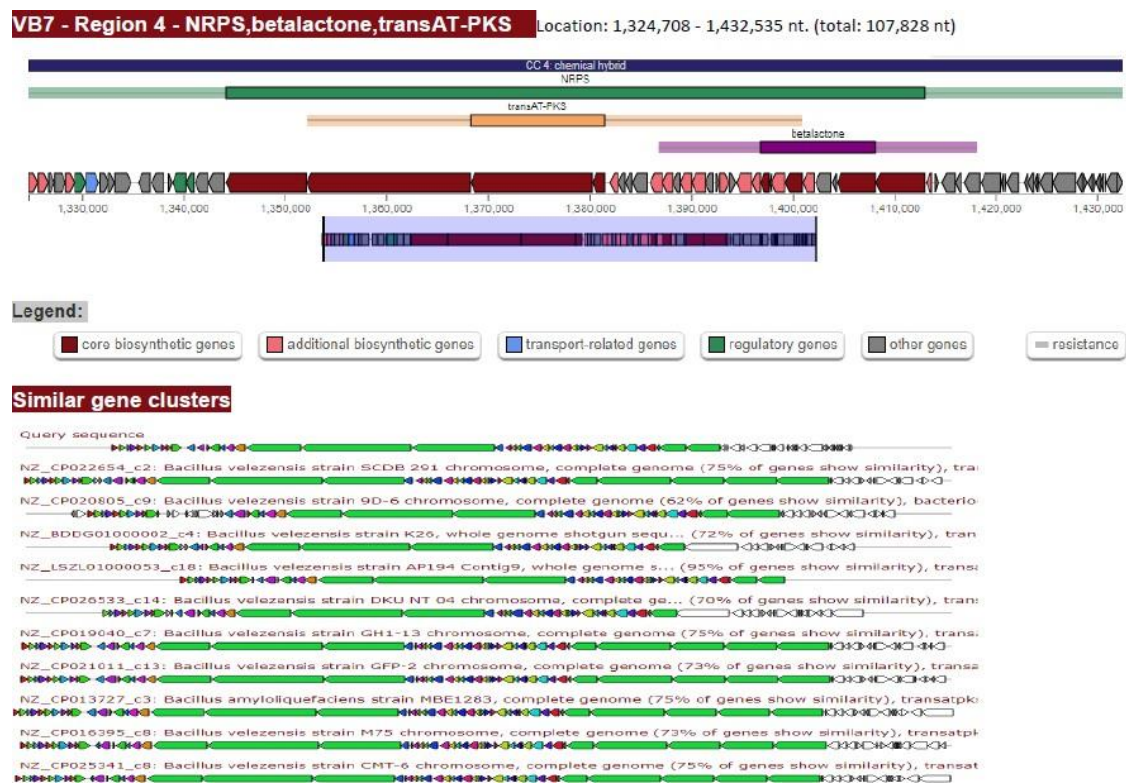

**Figure S7** Region-5 coding for secondary metabolite, transAT-PKS, transAT-PKS-like in genome of *Bacillus velezensis* – VB7

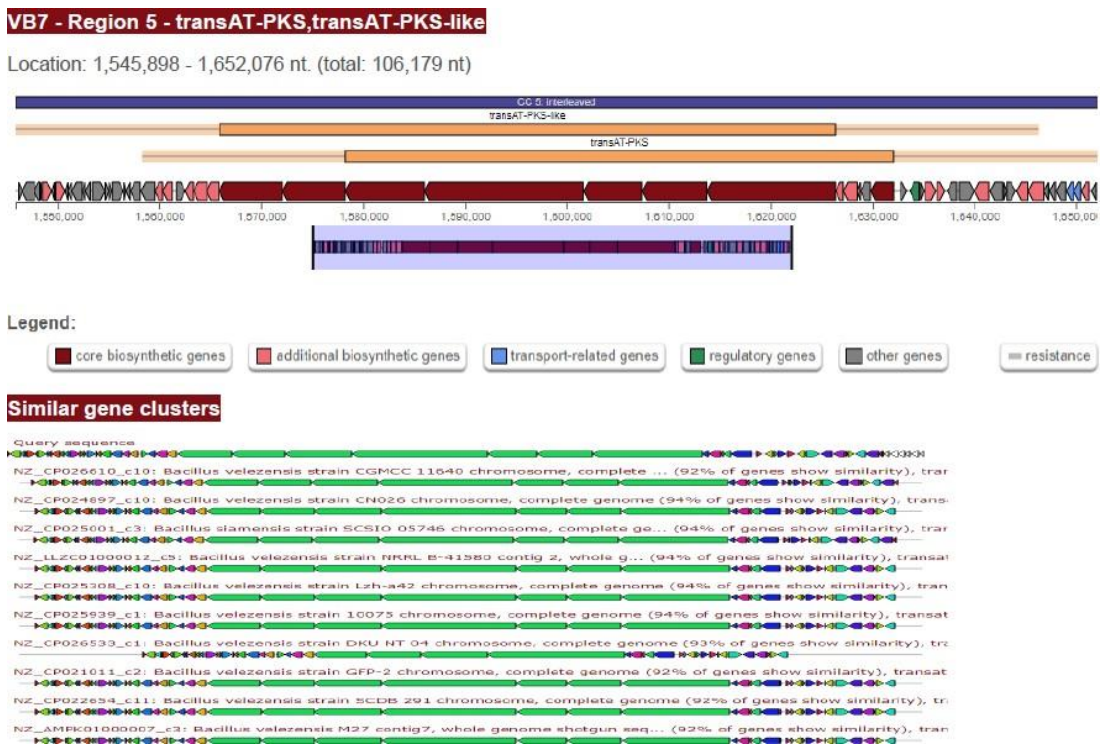

**Figure S8** Region-6 coding for secondary metabolite, NRPS, bacteriocin in genome of *Bacillus velezensis* – VB7

### VB7 - Region 6 - NRPS, bacteriocin

Location: 2,089,753 - 2,141,546 nt. (total: 51,794 nt)

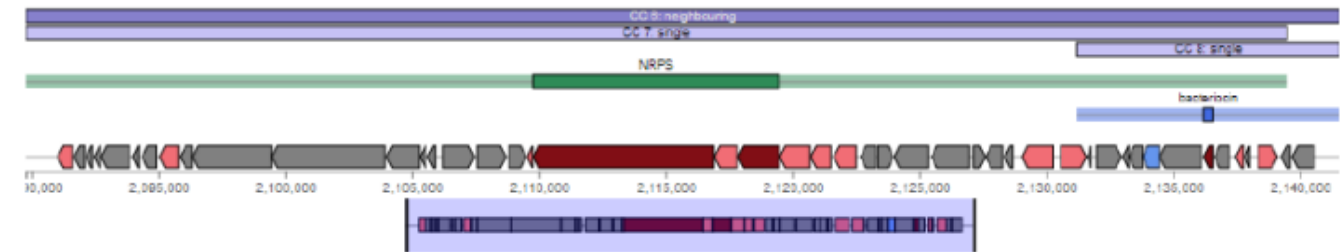

Legend:

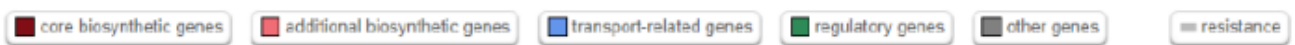

### Similar gene clusters

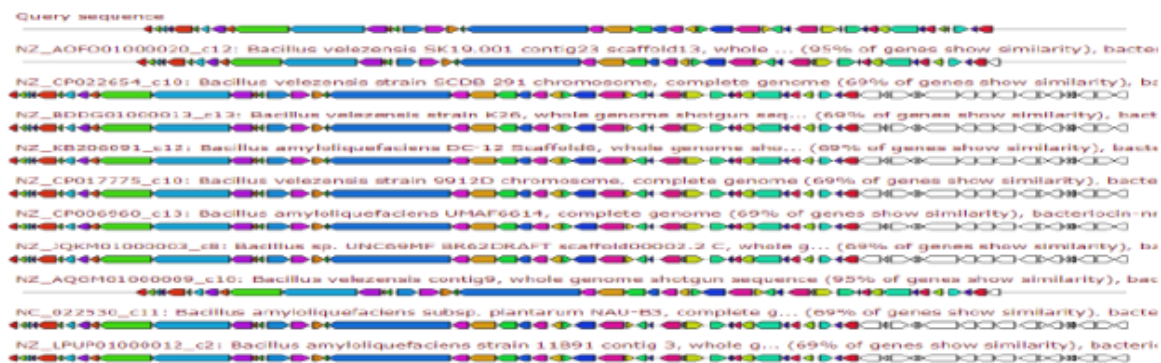



**Figure S9** Region-7 coding for other secondary metabolite, bacilysin in genome of *B. velezensis* VB7

#### VB7 - Region 7 – other

Location: 2,673,492 - 2,714,910 nt. (total: 41,419 nt)

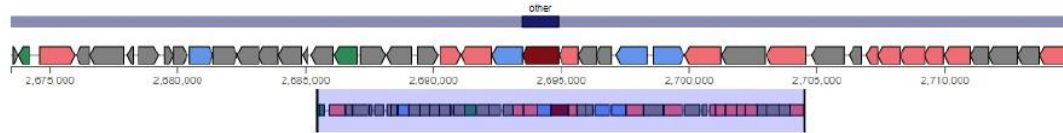

#### Similar gene clusters

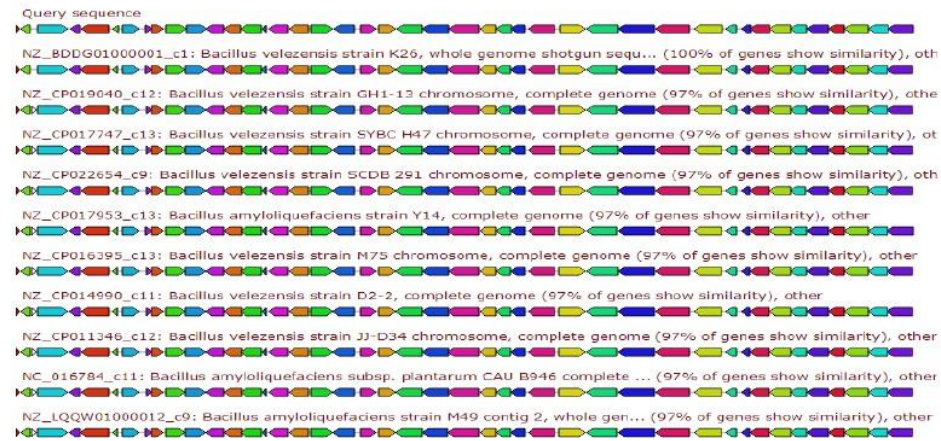

**Figure S10** Region-8 coding for other secondary metabolite, lanthipeptide in genome of *B. velezensis* – VB7

#### VB7 - Region 8 – lanthipeptide

Location: 2,856,858 - 2,880,046 nt. (total: 23,189 nt)

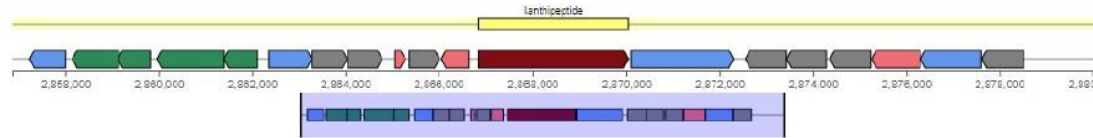

#### Similar gene clusters

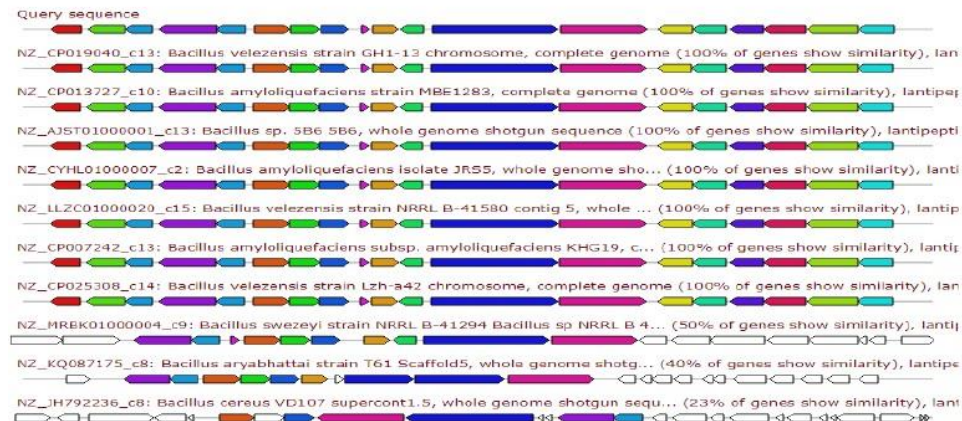

**Figure S11.** Antiviral efficacy of *Bacillus* spp., and chemical inducers on the suppression of tomato spotted wilt virus in cowpea local lesion host

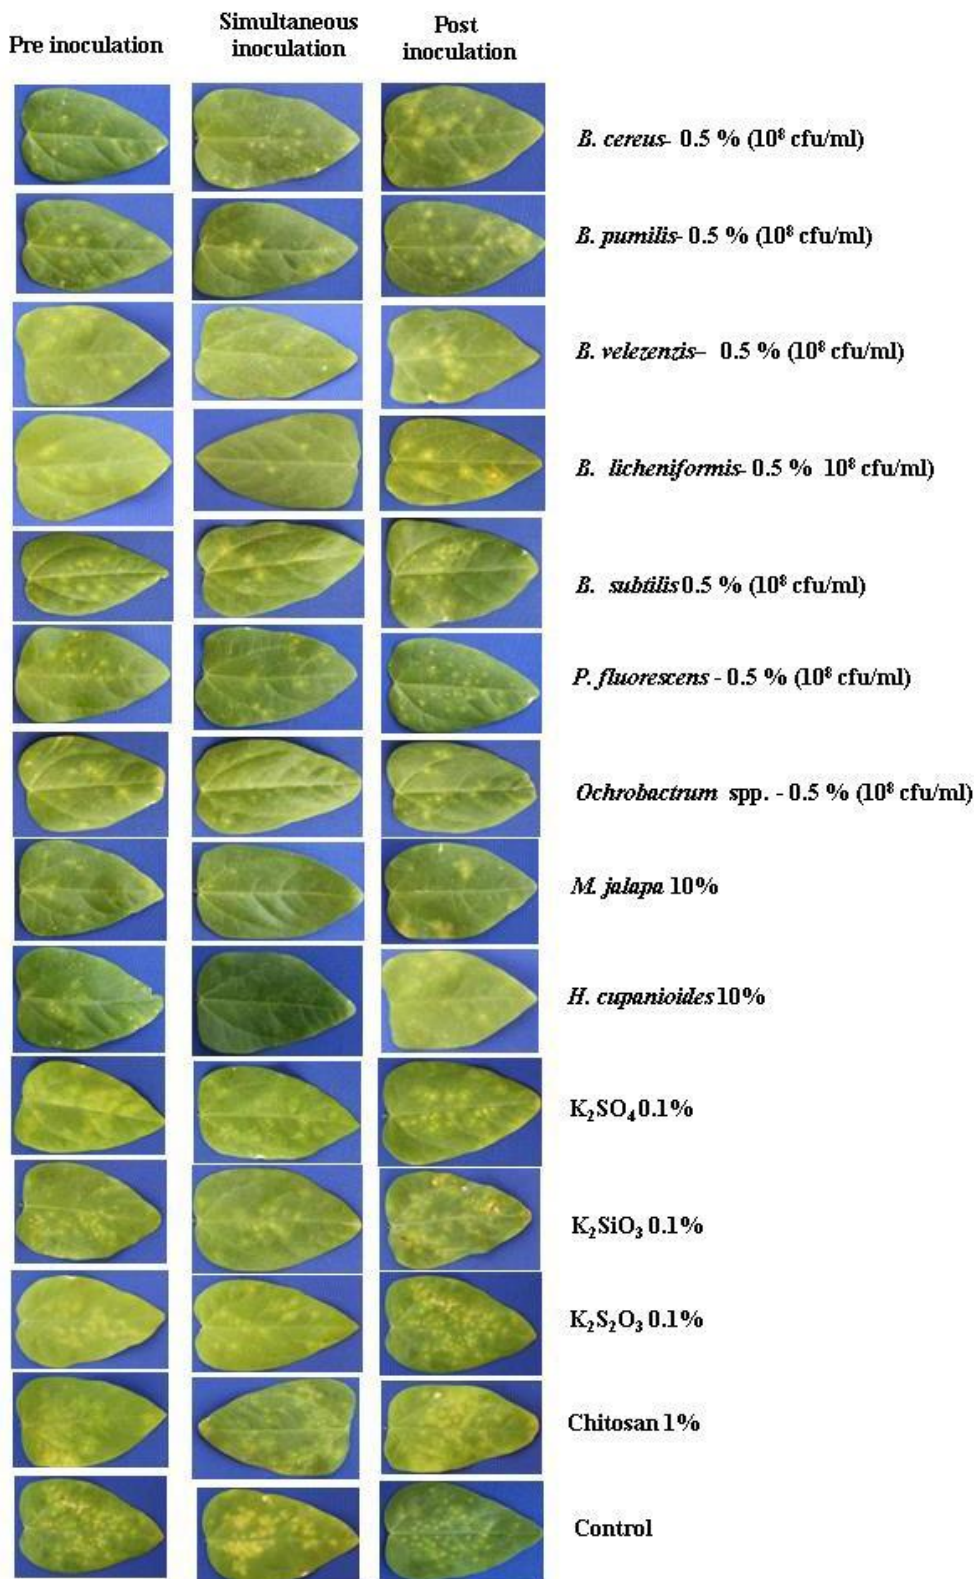

**Figure S12** Evaluation of *B. amyloliquefaciens* VB7 and botanicals against TSWV on Chrysanthemum under field condition.

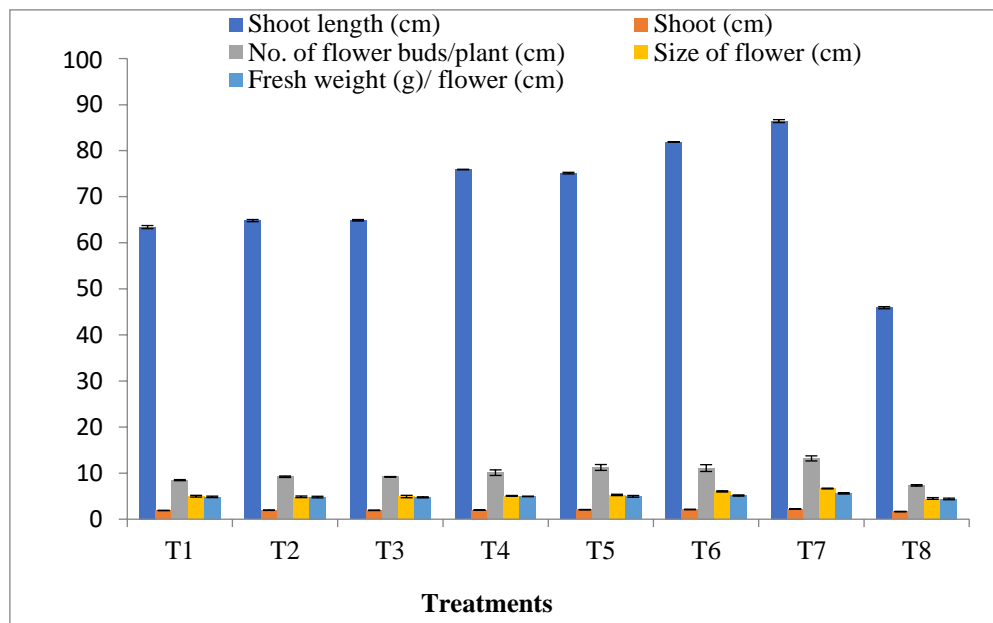

Note: T1 - *B. velezensis* VB7; T2 - *M. jalapa*; T3 - *H. cupanioides*; T4 - *B.velezensis* VB7 + *M. jalapa*; T5 - *B. velezensis* VB7 + *H. cupanioides*; T6 - *M. jalapa* + *H. cupanioides*; T7 - *B. velezensis* VB7 + *M. jalapa* + *H. cupanioides*; T8 - Untreated control

**Figure S13** TSWV incidence and absorbance in chrysanthemum plants after the application of bio-control agents and botanicals under field condition

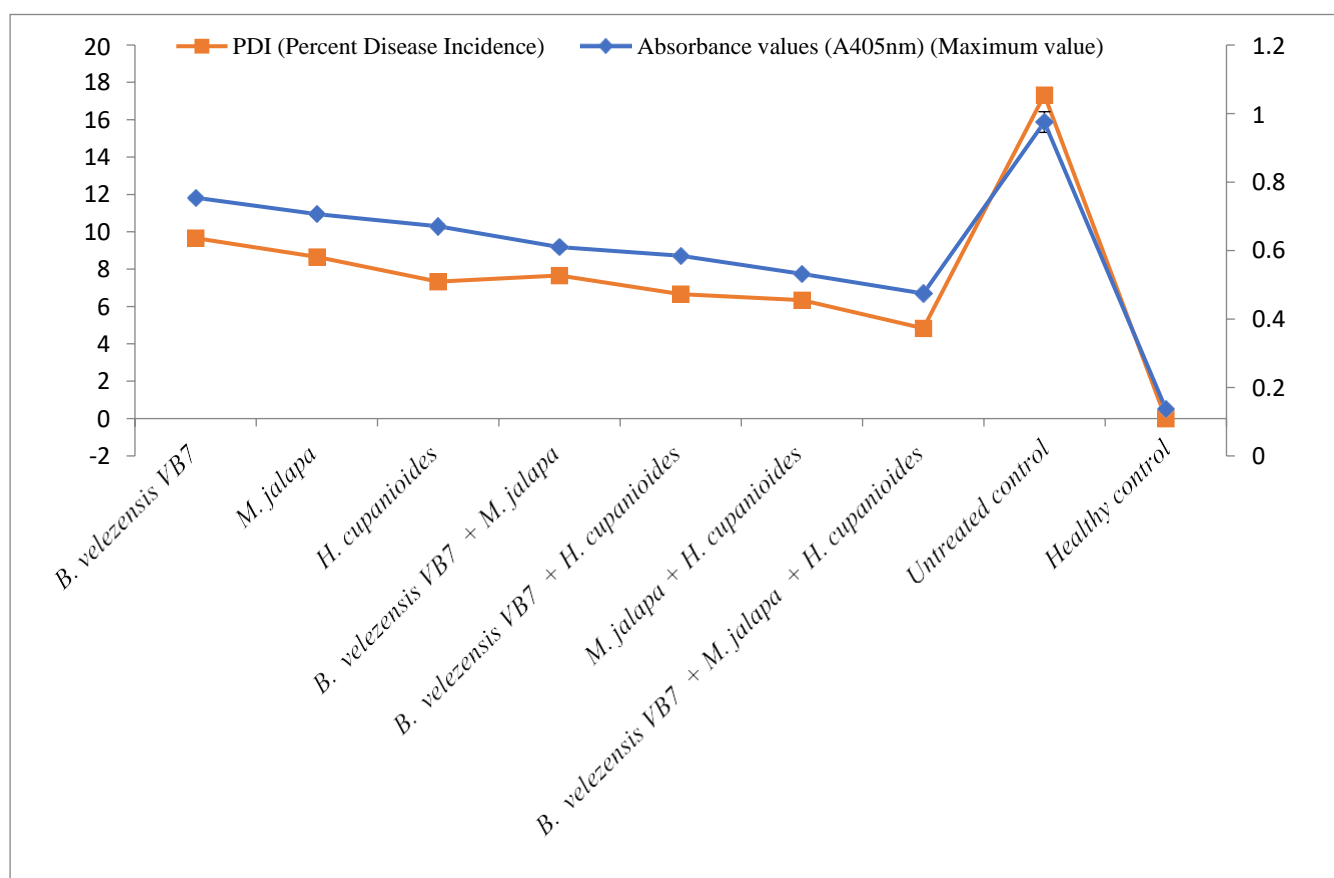



**Figure S14.** Antifungal activity of bacterial antagonists against *F. oxysporum* f.sp. *bense in vitro*

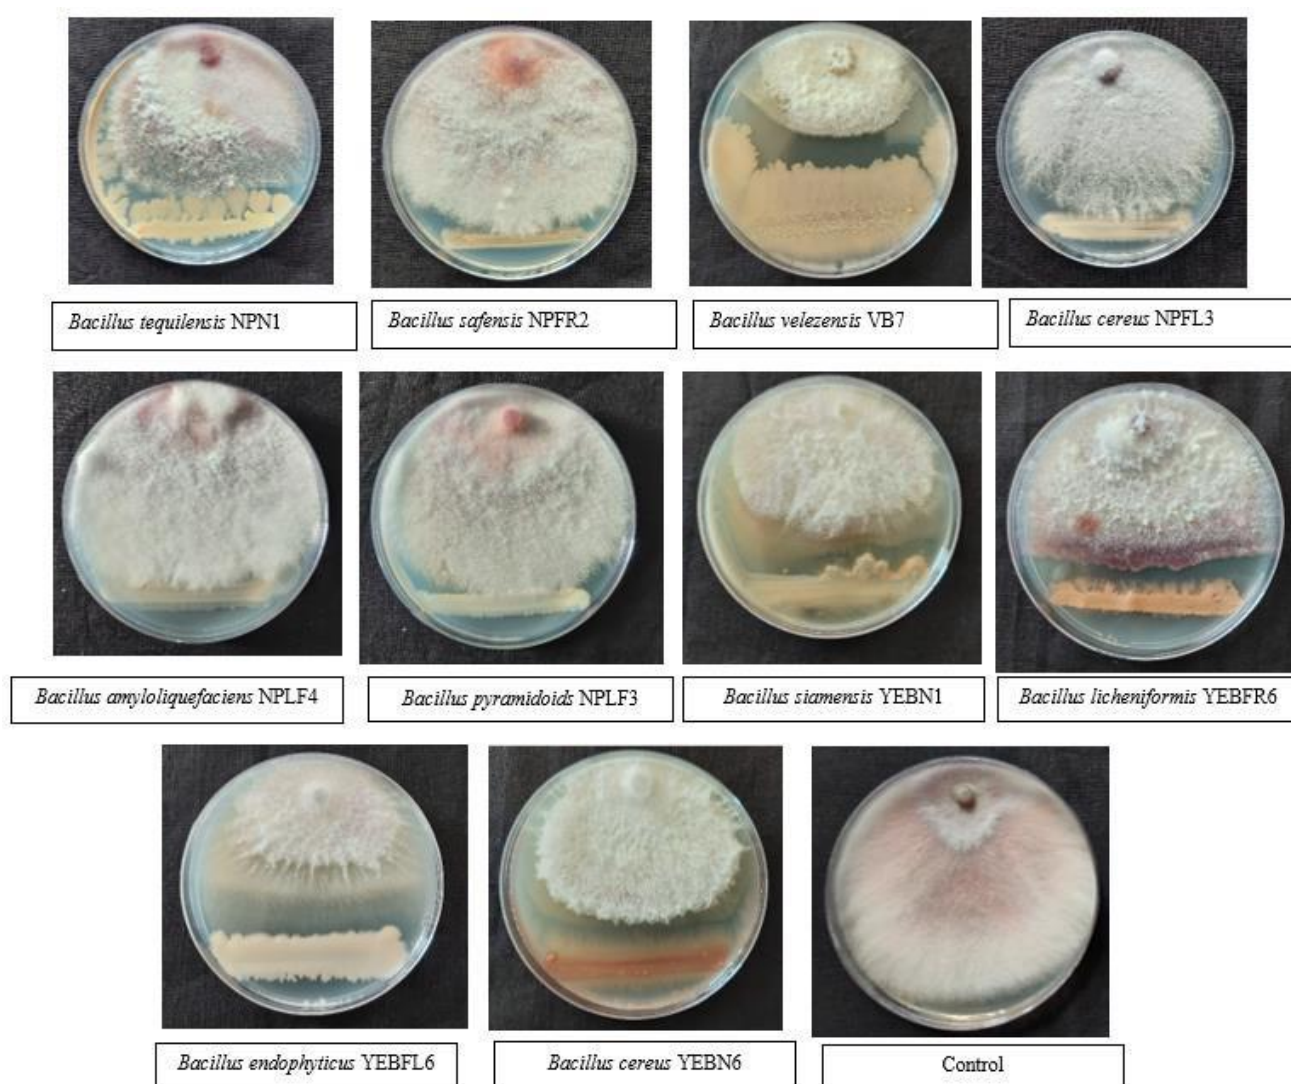

**Figure S15** GCMS chromatogram of volatile and non-volatile organic compounds (VOC and NVOC) produced during the interaction of *Bacillus velezensis* + *Foc*

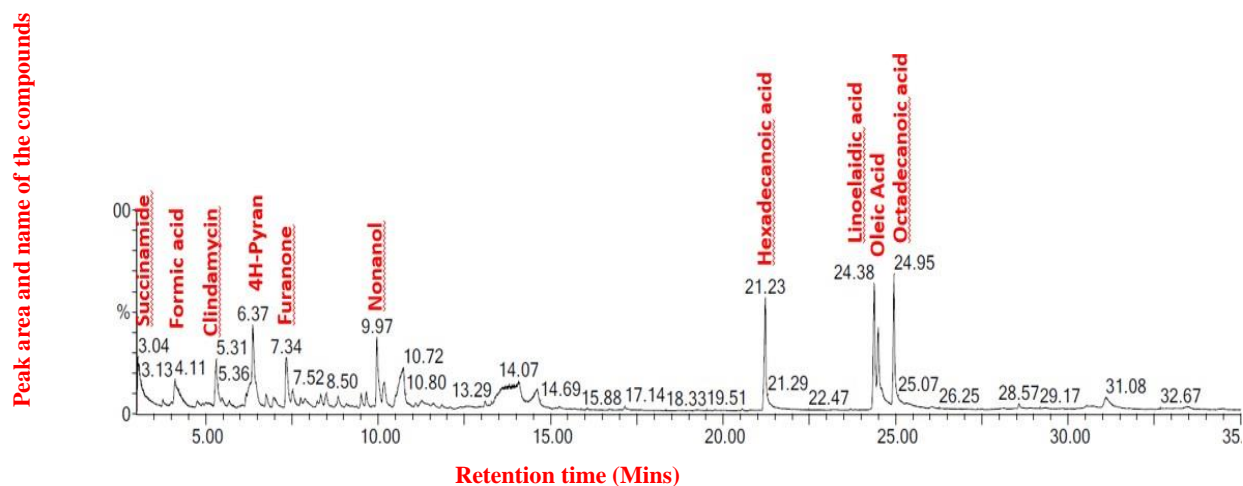

**Figure S16** GCMS chromatogram of volatile and non-volatile organic compounds (VOC and NVOC) produced by *Bacillus velezensis* VB7.

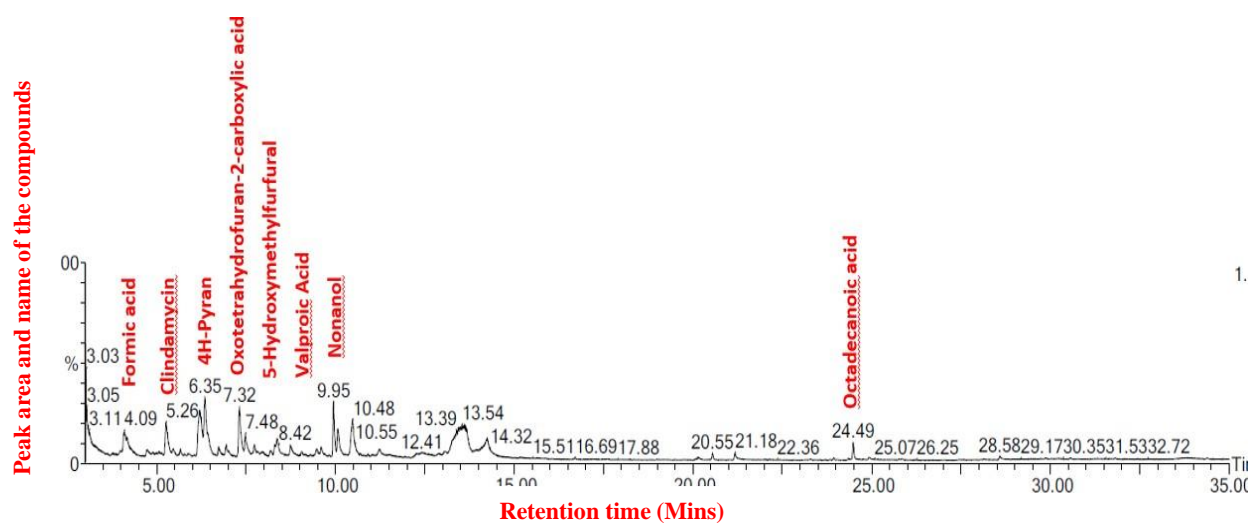



**Table S1.** Assembly details of the antagonistic bacterial isolate *B. velezensis* VB7 -CP047587

|                                                        |              |
|--------------------------------------------------------|--------------|
| Contigs                                                | 1            |
| GC Content                                             | 46.79        |
| Plasmids                                               | 0            |
| Contigs L50                                            | 1            |
| Genome Length                                          | 3,021,183 bp |
| Contig N50                                             | 3,021,183    |
| CDS                                                    | 3,090        |
| tRNA                                                   | 85           |
| rRNA                                                   | 29           |
| Repeat region                                          | 21           |
| Partial CDS                                            | 0            |
| Miscellaneous region                                   | 0            |
| Hypothetical proteins                                  | 506          |
| Proteins with functional assignments                   | 2,584        |
| Proteins with EC number assignments                    | 822          |
| Proteins with GO assignments                           | 684          |
| Proteins with Pathway assignments                      | 607          |
| Proteins with Subsystem assignments                    | 858          |
| Proteins with genus-specific family (Pfam) assignments | 2,976        |
| Proteins with cross-genus family (PGfam) assignments   | 2,976        |

**Table S2.** Annotation of virulence factor features in the genome of *B. velezensis* – VB7

| <b>Database</b> | <b>Gene</b> | <b>Product</b>                                                  | <b>Classification</b>                  |
|-----------------|-------------|-----------------------------------------------------------------|----------------------------------------|
| Victors         | codY        | GTP-sensing transcriptional pleiotropic repressor CodY          | -                                      |
| Victors         | clpX        | ATP-dependent Clp protease ATP-binding subunit ClpX             | -                                      |
| PATRIC-VF       | purB        | Adenylosuccinate lyase (EC 4.3.2.2) @ SAICAR lyase (EC 4.3.2.2) | Virulence                              |
| PATRIC-VF       | RsfA        | Ribosomal silencing factor RsfA                                 | Intracellular survival and replication |
| PATRIC-VF       | purA        | Adenylosuccinate synthetase (EC 6.3.4.4)                        | Intracellular survival and replication |
| VFDB            | fliP        | flagellar biosynthetic protein (FlhP)                           | -                                      |

**Table S3.** Subsystem analysis of the genome *Bacillus velezensis* – VB7

| <b>Super Class</b>                  | <b>No. of Subsystem</b> | <b>No. of families/ genes</b> |
|-------------------------------------|-------------------------|-------------------------------|
| Metabolism                          | 73                      | 463                           |
| Cellular Processes                  | 27                      | 190                           |
| Stress response, defense, virulence | 27                      | 116                           |
| Protein processing                  | 36                      | 111                           |
| Energy                              | 18                      | 104                           |
| DNA processing                      | 16                      | 64                            |
| Membrane transport                  | 14                      | 63                            |
| RNA processing                      | 10                      | 36                            |
| Cell Envelope                       | 4                       | 15                            |
| Regulation and Cell signalling      | 3                       | 11                            |
| Miscellaneous                       | 3                       | 7                             |

**Table S4.** Details of unique genes in the genome of *B. velezensis* VB7 with their genomics position of coding sequence and protein product.

| Genome start position | End position | Nucleotide Length | Strand (-/+) | Amino acid length | Protein                                                        |
|-----------------------|--------------|-------------------|--------------|-------------------|----------------------------------------------------------------|
| 893183                | 893773       | 591               | -            | 196               | Phage-like element PBSX protein xkdA                           |
| 893922                | 894260       | 339               | -            | 112               | Transcriptional regulator Xre, Cro/CI family                   |
| 2296275               | 2297015      | 741               | -            | 246               | Carboxylesterase (EC 3.1.1.1)                                  |
| 2297134               | 2297364      | 231               | -            | 76                | Protein translocase membrane subunit SecG                      |
| 2382458               | 2382598      | 141               | -            | 46                | UPF0311 protein BSU34410                                       |
| 2733044               | 2733793      | 750               | -            | 249               | FMN reductase (NADPH) (EC 1.5.1.38)                            |
| 2733897               | 2735084      | 1188              | -            | 395               | Rod shape-determining protein RodA                             |
| 2735286               | 2735744      | 459               | -            | 152               | Uncharacterized N-acetyl transferase YedL                      |
| 2736342               | 2736710      | 369               | -            | 122               | Cytochrome aa3-600 menaquinol oxidase subunit IV               |
| 2736712               | 2737326      | 615               | -            | 204               | Cytochrome aa3-600 menaquinol oxidase subunit III              |
| 2737341               | 2739290      | 1950              | -            | 649               | Cytochrome aa3-600 menaquinol oxidase subunit I                |
| 2739318               | 2740283      | 966               | -            | 321               | Cytochrome aa3-600 menaquinol oxidase subunit II               |
| 2762549               | 2764060      | 1512              | +            | 503               | D-alanine--poly(phosphoribitol) ligase subunit 1 (EC 6.1.1.13) |
| 2736038               | 2736298      | 261               | +            | 86                | Spore morphogenesis and germination protein YwcE               |
